# Supplementary material
Source: PubMed Central journal article supplement (PMC8251652)
Supplement: jamaoncol-e211683-s002.pdf [file jamaoncol-e211683-s002.pdf]

## Supplementary Online Content

Rahma OE, Yothers G, Hong TS, et al. Use of total neoadjuvant therapy for locally advanced rectal cancer: initial results from the pembrolizumab arm of a phase 2 randomized clinical trial. *JAMA Oncol*. Published online July 1, 2021. doi:10.1001/jamaoncol.2021.1683

**eTable.** Immune-Related Adverse Events During and After Chemoradiation: NRG Oncology GI002

**eFigure.** Study Schema: NRG Oncology GI002

This supplementary material has been provided by the authors to give readers additional information about their work.

**eTable.** Immune-Related Adverse Events During and After Chemoradiotherapy: NRG Oncology GI002

| System Organ Class/Term                                | RT + Capecitabine<br>(n=83) |       |       |       | RT + Capecitabine +<br>Pembrolizumab (n=81) |       |       |       |
|--------------------------------------------------------|-----------------------------|-------|-------|-------|---------------------------------------------|-------|-------|-------|
|                                                        | n and (%) of Pts by Grade   |       |       |       | n and (%) of Pts by Grade                   |       |       |       |
|                                                        | 2                           | 3     | 4     | 5     | 2                                           | 3     | 4     | 5     |
| <b>Overall Highest Grade</b>                           | 19                          | 8     | 0     | 0     | 32                                          | 3     | 0     | 0     |
|                                                        | (22.9)                      | (9.6) | (0.0) | (0.0) | (39.5)                                      | (3.7) | (0.0) | (0.0) |
| <b>ENDOCRINE DISORDERS</b>                             | 1                           | 0     | 0     | 0     | 10                                          | 1     | 0     | 0     |
|                                                        | (1.2)                       | (0.0) | (0.0) | (0.0) | (12.3)                                      | (1.2) | (0.0) | (0.0) |
| Hyperthyroidism                                        | 0                           | 0     | 0     | 0     | 5                                           | 0     | 0     | 0     |
|                                                        | (0.0)                       | (0.0) | (0.0) | (0.0) | (6.2)                                       | (0.0) | (0.0) | (0.0) |
| Hypothyroidism                                         | 1                           | 0     | 0     | 0     | 7                                           | 1     | 0     | 0     |
|                                                        | (1.2)                       | (0.0) | (0.0) | (0.0) | (8.6)                                       | (1.2) | (0.0) | (0.0) |
| <b>GASTROINTESTINAL DISORDERS</b>                      | 14                          | 7     | 0     | 0     | 19                                          | 2     | 0     | 0     |
|                                                        | (16.9)                      | (8.4) | (0.0) | (0.0) | (23.5)                                      | (2.5) | (0.0) | (0.0) |
| Colitis                                                | 1                           | 0     | 0     | 0     | 2                                           | 0     | 0     | 0     |
|                                                        | (1.2)                       | (0.0) | (0.0) | (0.0) | (2.5)                                       | (0.0) | (0.0) | (0.0) |
| Diarrhea                                               | 13                          | 7     | 0     | 0     | 18                                          | 2     | 0     | 0     |
|                                                        | (15.7)                      | (8.4) | (0.0) | (0.0) | (22.2)                                      | (2.5) | (0.0) | (0.0) |
| Enterocolitis                                          | 1                           | 0     | 0     | 0     | 0                                           | 0     | 0     | 0     |
|                                                        | (1.2)                       | (0.0) | (0.0) | (0.0) | (0.0)                                       | (0.0) | (0.0) | (0.0) |
| <b>HEPATOBIILIARY</b>                                  | 2                           | 1     | 0     | 0     | 5                                           | 0     | 0     | 0     |
|                                                        | (2.4)                       | (1.2) | (0.0) | (0.0) | (6.2)                                       | (0.0) | (0.0) | (0.0) |
| Alanine aminotransferase increased                     | 1                           | 0     | 0     | 0     | 2                                           | 0     | 0     | 0     |
|                                                        | (1.2)                       | (0.0) | (0.0) | (0.0) | (2.5)                                       | (0.0) | (0.0) | (0.0) |
| Alkaline phosphatase increased                         | 0                           | 0     | 0     | 0     | 1                                           | 0     | 0     | 0     |
|                                                        | (0.0)                       | (0.0) | (0.0) | (0.0) | (1.2)                                       | (0.0) | (0.0) | (0.0) |
| Aspartate aminotransferase increased                   | 0                           | 1     | 0     | 0     | 2                                           | 0     | 0     | 0     |
|                                                        | (0.0)                       | (1.2) | (0.0) | (0.0) | (2.5)                                       | (0.0) | (0.0) | (0.0) |
| Blood bilirubin increased                              | 1                           | 0     | 0     | 0     | 3                                           | 0     | 0     | 0     |
|                                                        | (1.2)                       | (0.0) | (0.0) | (0.0) | (3.7)                                       | (0.0) | (0.0) | (0.0) |
| <b>MUSCULOSKELETAL AND CONNECTIVE TISSUE DISORDERS</b> | 1                           | 0     | 0     | 0     | 5                                           | 0     | 0     | 0     |
|                                                        | (1.2)                       | (0.0) | (0.0) | (0.0) | (6.2)                                       | (0.0) | (0.0) | (0.0) |

| System Organ Class/Term                           | RT + Capecitabine<br>(n=83) |       |       |       | RT + Capecitabine +<br>Pembrolizumab (n=81) |       |       |       |
|---------------------------------------------------|-----------------------------|-------|-------|-------|---------------------------------------------|-------|-------|-------|
|                                                   | n and (%) of Pts by Grade   |       |       |       | n and (%) of Pts by Grade                   |       |       |       |
|                                                   | 2                           | 3     | 4     | 5     | 2                                           | 3     | 4     | 5     |
| Arthralgia                                        | 0                           | 0     | 0     | 0     | 4                                           | 0     | 0     | 0     |
|                                                   | (0.0)                       | (0.0) | (0.0) | (0.0) | (4.9)                                       | (0.0) | (0.0) | (0.0) |
| Myalgia                                           | 1                           | 0     | 0     | 0     | 2                                           | 0     | 0     | 0     |
|                                                   | (1.2)                       | (0.0) | (0.0) | (0.0) | (2.5)                                       | (0.0) | (0.0) | (0.0) |
| <b>SKIN AND SUBCUTANEOUS<br/>TISSUE DISORDERS</b> | 2                           | 0     | 0     | 0     | 3                                           | 0     | 0     | 0     |
|                                                   | (2.4)                       | (0.0) | (0.0) | (0.0) | (3.7)                                       | (0.0) | (0.0) | (0.0) |
| Pruritus                                          | 1                           | 0     | 0     | 0     | 1                                           | 0     | 0     | 0     |
|                                                   | (1.2)                       | (0.0) | (0.0) | (0.0) | (1.2)                                       | (0.0) | (0.0) | (0.0) |
| Rash maculo-papular                               | 2                           | 0     | 0     | 0     | 2                                           | 0     | 0     | 0     |
|                                                   | (2.4)                       | (0.0) | (0.0) | (0.0) | (2.5)                                       | (0.0) | (0.0) | (0.0) |

Abbreviations: RT, radiotherapy. Adverse events were graded with CTCAE version 5.

**eFigure.** Study Schema: NRG Oncology GI002

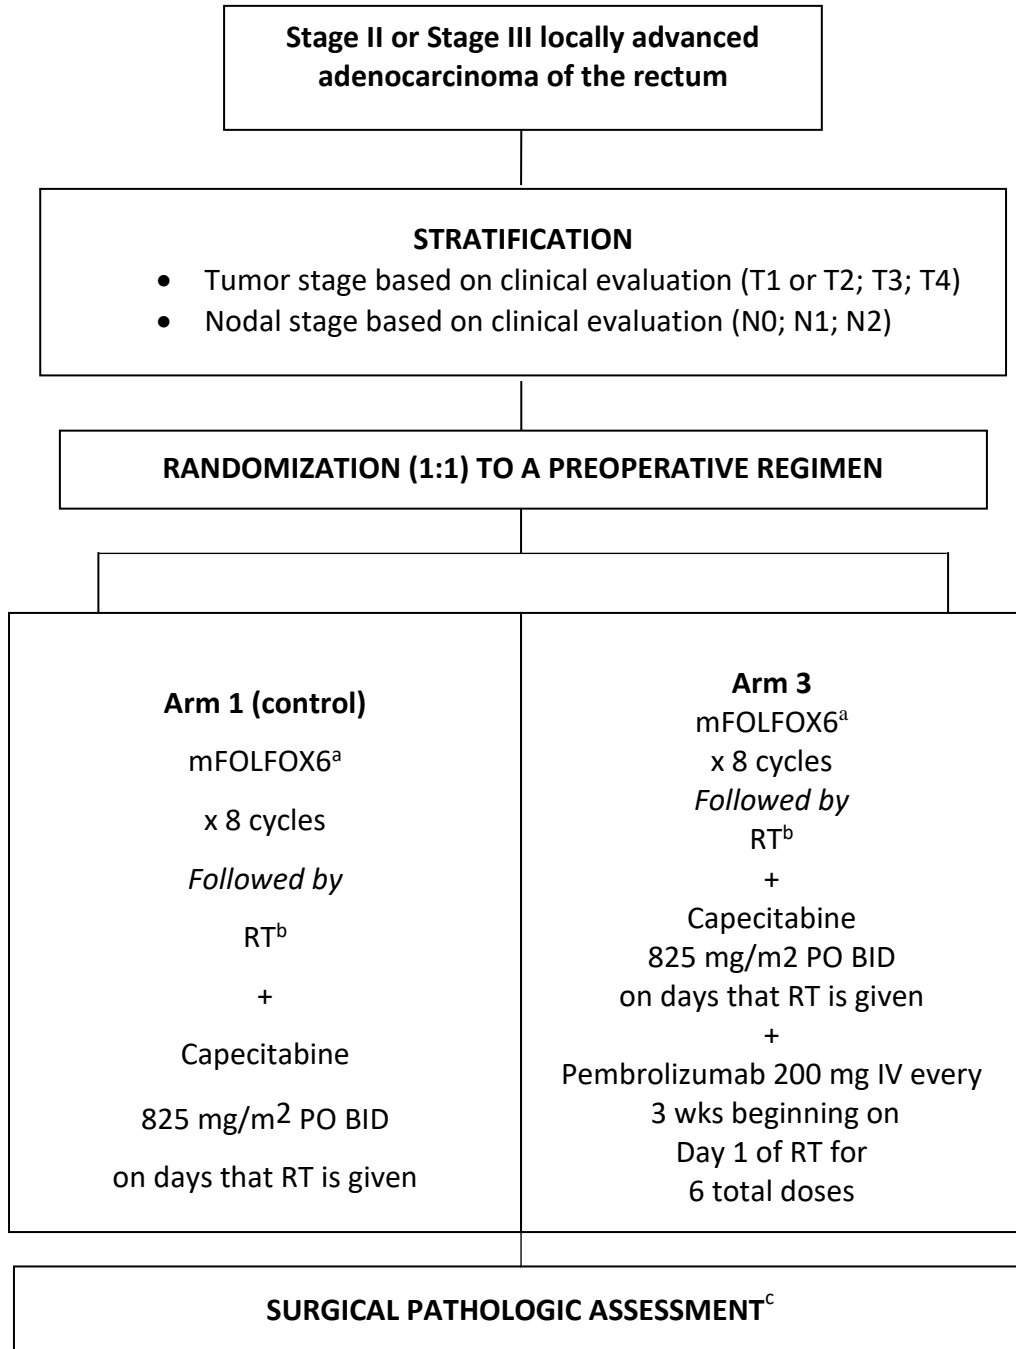

<sup>a</sup>**modified FOLFOX6 regimen:** Oxaliplatin 85mg/m<sup>2</sup> IV Day 1 + leucovorin 400mg/m<sup>2</sup> IV Day 1 + 5-FU 400mg/m<sup>2</sup> IV bolus followed by 5-FU 2400 mg/m<sup>2</sup> continuous infusion over 46 hrs every 2 wks for 8 cycles.

<sup>b</sup>**RT starts 3-4 weeks following last dose of mFOLFOX6.**  
4500 cGy in 25 fractions over 5 wks + 540 cGy boost in 3 fractions.

<sup>c</sup>Surgery performed 8-12 wks following last dose of radiotherapy.
