# Supplementary material
Source: PubMed Central journal article supplement (PMC8251652)
Supplement: jamaoncol-e211683-s003.pdf [file jamaoncol-e211683-s003.pdf]

# Data Sharing Statement

Rahma. Use of Total Neoadjuvant Therapy for Locally Advanced Rectal Cancer. *JAMA Oncol*. Published July 01, 2021.  
doi:10.1001/jamaoncol.2021.1683

## Data

**Data available:** Yes

**Data types:** Deidentified participant data, Data dictionary

**How to access data:** Data Sharing Statement: The study protocol and informed consent form will be made available. Individual participant data that underlie the results reported in this article, after de-identification, will be available within one year after publication and will be accessible through the NCTN Data Archive. Data will be available to researchers who wish to analyze the data in secondary studies to enhance the public health benefit of the original work. Requirements may include (but not be limited to): a research plan, a Data Use Agreement (DUA), and legally binding signatures.

**When available:** beginning date: 06-01-2022

## Supporting Documents

**Document types:** None

## Additional Information

**Who can access the data:** Data will be available to researchers who wish to analyze the data in secondary studies to enhance the public health benefit of the original work.

**Types of analyses:** Secondary studies to enhance the public health benefit of the original work

**Mechanisms of data availability:** Requirements may include (but not be limited to): a research plan, a Data Use Agreement (DUA), and legally binding signatures.
